# Supplementary material for: Evidence of a wide gap between COVID-19 in humans and animal models: a systematic review
Source: Springer Nature journal article supplement (doi:10.1186/s13054-020-03304-8), 2020-10-06
Supplement: MOESM2 [file 18454322]

## Additional file 2. List of excluded studies

| #  | Excluded Studies JAN 1-MAY 20 2020                                                                                                                           | Exclusion reason                  |
|----|--------------------------------------------------------------------------------------------------------------------------------------------------------------|-----------------------------------|
|    | <b>CATEGORY A</b>                                                                                                                                            | <b>Unrelated to animal models</b> |
| 1  | Potential host range of multiple SARS-like coronaviruses and an improved ACE2-Fc variant that is potent against both SARS-CoV-2 and SARS-CoV-1               | In vitro                          |
| 2  | Exceptional diversity and selection pressure on SARS-CoV and SARS-CoV-2 host receptor in bats compared to other mammals                                      | Computational                     |
| 3  | Recombination and lineage-specific mutations led to the emergence of SARS-CoV-2                                                                              | Computational                     |
| 4  | Genome based Evolutionary study of SARS-CoV-2 towards the Prediction of Epitope Based Chimeric Vaccine                                                       | Computational                     |
| 5  | Critical role of type III interferon in controlling SARS-CoV-2 infection, replication and spread in primary human intestinal epithelial cells                | In vitro                          |
| 6  | TMPRSS2 and furin are both essential for proteolytic activation and spread of SARS-CoV-2 in human airway epithelial cells and provide promising drug targets | In vitro                          |
| 7  | Search for SARS-CoV-2 inhibitors in currently approved drugs to tackle COVID-19 pandemic                                                                     | In vitro                          |
| 8  | SARS-coronavirus-2 replication in Vero E6 cells: replication kinetics, rapid adaptation and cytopathology                                                    | In vitro                          |
| 9  | Coronavirus and PARP expression dysregulate the NAD Metabolome: a potentially actionable component of innate immunity                                        | In vitro                          |
| 10 | TMPRSS2 and TMPRSS4 mediate SARS-CoV-2 infection of human small intestinal enterocytes                                                                       | In vitro                          |
| 11 | Positive selection of ORF3a and ORF8 genes drives the evolution of SARS-CoV-2 during the 2020 COVID-19 pandemic                                              | Computational                     |
| 12 | Structural and functional analysis of a potent sarbecovirus neutralizing antibody                                                                            | In vitro                          |
| 13 | Recapitulation of SARS-CoV-2 Infection and Cholangiocyte Damage with Human Liver Organoids                                                                   | In vitro                          |
| 14 | A data-driven drug repositioning framework discovered a potential therapeutic agent targeting COVID-19                                                       | In silico                         |
| 15 | Human iPSC-Derived Cardiomyocytes are Susceptible to SARS-CoV-2 Infection                                                                                    | In vitro                          |
| 16 | Humanized Single Domain Antibodies Neutralize SARS-CoV-2 by Targeting Spike Receptor Binding Domain                                                          | In vitro                          |
| 17 | Multivariate Analyses of Codon Usage of SARS-CoV-2 and other betacoronaviruses                                                                               | Computational                     |
| 18 | Spike protein binding prediction with neutralizing antibodies of SARS-CoV-2                                                                                  | Computational                     |

|    |                                                                                                                                                                                                                                                             |               |
|----|-------------------------------------------------------------------------------------------------------------------------------------------------------------------------------------------------------------------------------------------------------------|---------------|
| 19 | A human monoclonal antibody blocking SARS-CoV-2 infection                                                                                                                                                                                                   | In vitro      |
| 20 | Fully human single-domain antibodies against SARS-CoV-2                                                                                                                                                                                                     | Computational |
| 21 | The severe acute respiratory syndrome coronavirus 2 (SARS-CoV-2) envelope (E) protein harbors a conserved BH3-like sequence                                                                                                                                 | Computational |
| 22 | Functional pangenome analysis suggests inhibition of the protein E as a readily available therapy for COVID-2019                                                                                                                                            | Computational |
| 23 | Isolation and characterization of SARS-CoV-2 from the first US COVID-19 patient                                                                                                                                                                             | In vitro      |
| 24 | Analysis of the mutation dynamics of SARS-CoV-2 reveals the spread history and emergence of RBD mutant with lower ACE2 binding affinity                                                                                                                     | Computational |
| 25 | Structure-Based Design, Synthesis and Biological Evaluation of Peptidomimetic Aldehydes as a Novel Series of Antiviral Drug Candidates Targeting the SARS-CoV-2 Main Protease                                                                               | In vitro      |
| 26 | Artificial intelligence predicts the immunogenic landscape of SARS-CoV-2: toward universal blueprints for vaccine designs                                                                                                                                   | Computational |
| 27 | Development of CRISPR as a prophylactic strategy to combat novel coronavirus and influenza                                                                                                                                                                  | In vitro      |
| 28 | Discovery of baicalin and baicalein as novel, natural product inhibitors of SARS-CoV-2 3CL protease in vitro                                                                                                                                                | In vitro      |
| 29 | Atazanavir inhibits SARS-CoV-2 replication and pro-inflammatory cytokine production                                                                                                                                                                         | In vitro      |
| 30 | Identification of antiviral drug candidates against SARS-CoV-2 from FDA-approved drugs                                                                                                                                                                      | In vitro      |
| 31 | In-silico analysis of SARS-CoV-2 genomes: Insights from SARS encoded non-coding RNAs                                                                                                                                                                        | In silico     |
| 32 | Rapid SARS-CoV-2 whole genome sequencing for informed public health decision making in the Netherlands                                                                                                                                                      | Human         |
| 33 | BioLaboro: A bioinformatics system for detecting molecular assay signature erosion and designing new assays in response to emerging and reemerging pathogens                                                                                                | In silico     |
| 34 | Characterisation of the transcriptome and proteome of SARS-CoV-2 using direct RNA sequencing and tandem mass spectrometry reveals evidence for a cell passage induced in-frame deletion in the spike glycoprotein that removes the furin-like cleavage site | In vitro      |
| 35 | Crystal structure of SARS-CoV-2 nucleocapsid protein RNA binding domain reveals potential unique drug targeting sites                                                                                                                                       | In vitro      |
| 36 | Limited SARS-CoV-2 diversity within hosts and following passage in cell culture                                                                                                                                                                             | In vitro      |
| 37 | Exploring the genomic and proteomic variations of SARS-CoV-2 spike glycoprotein: a computational biology approach                                                                                                                                           | Computational |
| 38 | Evidence of the Recombinant Origin and Ongoing Mutations in Severe Acute Respiratory Syndrome Coronavirus 2 (SARS-CoV-2)                                                                                                                                    | Computational |
| 39 | A Library of Nucleotide Analogues Terminate RNA Synthesis Catalyzed by Polymerases of Coronaviruses Causing SARS and                                                                                                                                        | In vitro      |

|    |                                                                                                                                                        |                                   |
|----|--------------------------------------------------------------------------------------------------------------------------------------------------------|-----------------------------------|
|    | COVID-19                                                                                                                                               |                                   |
| 40 | Virus-host interactome and proteomic survey of PMBCs from COVID-19 patients reveal potential virulence factors influencing SARS-CoV-2 pathogenesis     | Human                             |
| 41 | Novel Immunoglobulin Domain Proteins Provide Insights into Evolution and Pathogenesis Mechanisms of SARS-Related Coronaviruses                         | Computational                     |
| 42 | RNA-GPS Predicts SARS-CoV-2 RNA Localization to Host Mitochondria and Nucleolus                                                                        | Computational<br>Machine learning |
| 43 | Comparative genomic analysis revealed specific mutation pattern between human coronavirus SARS-CoV-2 and Bat-SARSr-CoV RaTG13                          | Computational<br>Genomic analysis |
| 44 | The IMPDH inhibitor merimepodib suppresses SARS-CoV-2 replication in vitro                                                                             | In vitro                          |
| 45 | Preliminary identification of potential vaccine targets for the COVID-19 coronavirus (SARS-CoV-2) based on SARS-CoV immunological studies              | Computational                     |
| 46 | Scutellaria baicalensis extract and baicalein inhibit replication of SARS-CoV-2 and its 3C-like protease in vitro                                      | In vitro                          |
| 47 | Glycosaminoglycan binding motif at S1/S2 proteolytic cleavage site on spike glycoprotein may facilitate novel coronavirus (SARS-CoV-2) host cell entry | In vitro                          |
| 48 | Molecular Docking Analysis of Some Phytochemicals on Two Sars-Cov-2 Targets                                                                            | Computational                     |
| 49 | Identification of potential treatments for COVID-19 through artificial intelligence-enabled phenomic analysis of human cells infected with SARS-CoV-2  | In vitro                          |
| 50 | Genomic determinants of pathogenicity in SARS-CoV-2 and other human coronaviruses                                                                      | Computational<br>Machine learning |
| 51 | Emergence of SARS-CoV-2 through Recombination and Strong Purifying Selection                                                                           | Computational                     |
| 52 | A SARS-CoV-2-Human Protein-Protein Interaction Map Reveals Drug Targets and Potential Drug-Repurposing                                                 | In vitro                          |
| 53 | Computational Prediction of the Comprehensive SARS-CoV-2 vs. Human Interactome to Guide the Design of Therapeutics                                     | Computational                     |
| 54 | HTCC as a highly effective polymeric inhibitor of SARS-CoV-2 and MERS-CoV                                                                              | In vitro                          |
| 55 | The potential genetic network of human brain SARS-CoV-2 infection                                                                                      | Computational                     |
| 56 | Leveraging Deep Learning to Simulate Coronavirus Spike proteins has the potential to predict future Zoonotic sequences                                 | Computational                     |
| 57 | Energetics based epitope screening in SARS CoV-2 (COVID 19) spike glycoprotein by Immuno-informatic analysis aiming to a suitable vaccine development  | Computational                     |
| 58 | SARS-CoV-2 Isolation and Propagation from Turkish COVID-19 patients                                                                                    | Human                             |
| 59 | Emergence of RBD mutations in circulating SARS-CoV-2 strains                                                                                           | Computational                     |

|    |                                                                                                                                                                                                                 |               |
|----|-----------------------------------------------------------------------------------------------------------------------------------------------------------------------------------------------------------------|---------------|
|    | enhancing the structural stability and human ACE2 receptor affinity of the spike protein                                                                                                                        |               |
| 60 | Triphosphates of the Two Components in DESCOVY and TRUVADA are Inhibitors of the SARS-CoV-2 Polymerase                                                                                                          | In vitro      |
| 61 | Discovery of a 382-nt deletion during the early evolution of SARS-CoV-2                                                                                                                                         | Human         |
| 62 | The anti-HIV Drug Nelfinavir Mesylate (Viracept) is a Potent Inhibitor of Cell Fusion Caused by the SARS-CoV-2 Spike (S) Glycoprotein Warranting further Evaluation as an Antiviral against COVID-19 infections | In vitro      |
| 63 | Characterization and treatment of SARS-CoV-2 in nasal and bronchial human airway epithelia                                                                                                                      | Human         |
| 64 | Topoisomerase III- $\beta$ is required for efficient replication of positive-sense RNA viruses                                                                                                                  | In vitro      |
| 65 | Potent human neutralizing antibodies elicited by SARS-CoV-2 infection                                                                                                                                           | Human         |
| 66 | Identification of a common deletion in the spike protein of SARS-CoV-2                                                                                                                                          | Human         |
| 67 | Genetic Variability of Human Angiotensin-Converting Enzyme 2 (hACE2) Among Various Ethnic Populations                                                                                                           | Computational |
| 68 | Evolutionary origins of the SARS-CoV-2 sarbecovirus lineage responsible for the COVID-19 pandemic                                                                                                               | Computational |
| 69 | Cytotoxicity evaluation of chloroquine and hydroxychloroquine in multiple cell lines and tissues by dynamic imaging system and PBPK model                                                                       | In vitro      |
| 70 | Design an efficient multi-epitope peptide vaccine candidate against SARS-CoV-2: An in silico analysis                                                                                                           | In silico     |
| 71 | Replication of SARS-CoV-2 in human respiratory epithelium                                                                                                                                                       | In vitro      |
| 72 | Insights into The Codon Usage Bias of 13 Severe Acute Respiratory Syndrome Coronavirus 2 (SARS-CoV-2) Isolates from Different Geo-locations                                                                     | Computational |
| 73 | Molecular Modeling Evaluation of the Binding Effect of Ritonavir, Lopinavir and Darunavir to Severe Acute Respiratory Syndrome Coronavirus 2 Proteases                                                          | Computational |
| 74 | On the interactions of the receptor-binding domain of SARS-CoV-1 and SARS-CoV-2 spike proteins with monoclonal antibodies and the receptor ACE2                                                                 | Computational |
| 75 | CoV2ID: Detection and Therapeutics Oligo Database for SARS-CoV-2                                                                                                                                                | Computational |
| 76 | Designing a multi-epitope peptide-based vaccine against SARS-CoV-2                                                                                                                                              | In silico     |
| 77 | The protein expression profile of ACE2 in human tissues                                                                                                                                                         | Human         |
| 78 | Identification of potential vaccine candidates against SARS-CoV-2, A step forward to fight novel coronavirus 2019-nCoV: A Reverse Vaccinology Approach                                                          | In silico     |
| 79 | Rapid metagenomic characterization of a case of imported COVID-19 in Cambodia                                                                                                                                   | Human         |

|     |                                                                                                                                                                                    |               |
|-----|------------------------------------------------------------------------------------------------------------------------------------------------------------------------------------|---------------|
| 80  | The coronavirus proofreading exoribonuclease mediates extensive viral recombination                                                                                                | In vitro      |
| 81  | Computational analysis of microRNA-mediated interactions in SARS-CoV-2 infection                                                                                                   | Computational |
| 82  | Programmable low-cost DNA-based platform for viral RNA detection                                                                                                                   | In vitro      |
| 83  | The FDA- approved gold drug Auranofin inhibits novel coronavirus (SARS-COV-2) replication and attenuates inflammation in human cells                                               | In vitro      |
| 84  | Replication of Equine arteritis virus is efficiently suppressed by purine and pyrimidine biosynthesis inhibitors                                                                   | In vitro      |
| 85  | Structure of replicating SARS-CoV-2 polymerase                                                                                                                                     | In vitro      |
| 86  | Interpretable detection of novel human viruses from genome sequencing data                                                                                                         | Computational |
| 87  | Crystal structure of Nsp15 endoribonuclease NendoU from SARS-CoV-2                                                                                                                 | In vitro      |
| 88  | Viral Architecture of SARS-CoV-2 with Post-Fusion Spike Revealed by Cryo-EM                                                                                                        | Human         |
| 89  | Epitope-based chimeric peptide vaccine design against S, M and E proteins of SARS-CoV-2 etiologic agent of global pandemic COVID-19: an in silico approach                         | Computational |
| 90  | Identification of variable sites in Sars-CoV-2 and their abundance profiles in time                                                                                                | Computational |
| 91  | Repurposing Pyramax® for the Treatment of Ebola Virus Disease: Additivity of the Lysosomotropic Pyronaridine and Non-Lysosomotropic Artesunate                                     | In vitro      |
| 92  | Inhibition of PIKfyve kinase prevents infection by EBOV and SARS-CoV-2                                                                                                             | In vitro      |
| 93  | Design of multi epitope-based peptide vaccine against E protein of human COVID-19: An immunoinformatics approach                                                                   | Computational |
| 94  | In-depth Bioinformatic Analyses of Human SARS-CoV-2, SARS-CoV, MERS-CoV, and Other Nidovirales Suggest Important Roles of Noncanonical Nucleic Acid Structures in Their Lifecycles | Computational |
| 95  | Cryo-electron microscopy structure of the SARS-CoV spike glycoprotein provides insights into an evolution of unique coronavirus spike proteins                                     | In vitro      |
| 96  | Ultra-Low-Cost Integrated Silicon-based Transducer for On-Site, Genetic Detection of Pathogens                                                                                     | In vitro      |
| 97  | Partial RdRp sequences offer a robust method for Coronavirus subgenus classification                                                                                               | Computational |
| 98  | Codon usage and evolutionary rates of the 2019-nCoV genes                                                                                                                          | Computational |
| 99  | The Essential Facts of Wuhan Novel Coronavirus Outbreak in China and Epitope-based Vaccine Designing against COVID-19                                                              | Computational |
| 100 | A molecular cell atlas of the human lung from single cell RNA sequencing                                                                                                           | Human         |
| 101 | Potential T-cell and B-cell Epitopes of 2019-nCoV                                                                                                                                  | Computational |
| 102 | Azithromycin and ciprofloxacin have a chloroquine-like effect                                                                                                                      | In vitro      |

|     |                                                                                                                                                                                         |               |
|-----|-----------------------------------------------------------------------------------------------------------------------------------------------------------------------------------------|---------------|
|     | on respiratory epithelial cells                                                                                                                                                         |               |
| 103 | Coronavirus hemagglutinin-esterase and spike proteins co-evolve for functional balance and optimal virion avidity                                                                       | In vitro      |
| 104 | Characterising the epidemic spread of Influenza A/H3N2 within a city through phylogenetics                                                                                              | Computational |
| 105 | Bats Possess Unique Variants of the Antiviral Restriction Factor Tetherin                                                                                                               | In vitro      |
| 106 | In silico approach for designing of a multi-epitope based vaccine against novel Coronavirus (SARS-COV-2)                                                                                | In silico     |
| 107 | A facile method of mapping neutralizing HIV-1 epitopes                                                                                                                                  | In vitro      |
| 108 | Mutations, Recombination and Insertion in the Evolution of 2019-nCoV                                                                                                                    | Human         |
| 109 | Cryo-EM structure of coronavirus-HKU1 haemagglutinin esterase reveals architectural changes arising from prolonged circulation in humans                                                | In vitro      |
| 110 | Single-cell analysis of upper airway cells reveals host-viral dynamics in influenza infected adults                                                                                     | Human         |
| 111 | X-ray Structure of Main Protease of the Novel Coronavirus SARS-CoV-2 Enables Design of $\alpha$ -Ketoamide Inhibitors                                                                   | Analytical    |
| 112 | A unifying structural and functional model of the coronavirus replication organelle: tracking down RNA synthesis                                                                        | In vitro      |
| 113 | Inactivating porcine coronavirus before nuclei acid isolation with the temperature higher than 56 °C damages its genome integrity seriously                                             | In vitro      |
| 114 | Kallikrein 13: a new player in coronaviral infections                                                                                                                                   | In vitro      |
| 115 | A blueprint for the implementation of a validated approach for the detection of SARS-Cov2 in clinical samples in academic facilities                                                    | In vitro      |
| 116 | Comparative ACE2 variation and primate COVID-19 risk                                                                                                                                    | Computational |
| 117 | Broad and differential animal ACE2 receptor usage by SARS-CoV-2                                                                                                                         | Computational |
| 118 | Human organs-on-chips as tools for repurposing approved drugs as potential influenza and COVID19 therapeutics in viral pandemics                                                        | In vitro      |
| 119 | Structural basis to design multi-epitope vaccines against Novel Coronavirus 19 (COVID19) infection, the ongoing pandemic emergency: an in silico approach                               | In silico     |
| 120 | Molecular Detection of SARS-CoV-2 in Formalin Fixed Paraffin Embedded Specimens                                                                                                         | In vitro      |
| 121 | Computational simulations reveal the binding dynamics between human ACE2 and the receptor binding domain of SARS-CoV-2 spike protein                                                    | Computational |
| 122 | Atlas of ACE2 gene expression in mammals reveals novel insights in transmisson of SARS-Cov-2                                                                                            | Computational |
| 123 | Integrated analyses of single-cell atlases reveal age, gender, and smoking status associations with cell type-specific expression of mediators of SARS-CoV-2 viral entry and highlights | Computational |

|     |                                                                                                                                                                                          |                                  |
|-----|------------------------------------------------------------------------------------------------------------------------------------------------------------------------------------------|----------------------------------|
|     | inflammatory programs in putative target cells                                                                                                                                           |                                  |
| 124 | Scrutinizing the SARS-CoV-2 protein information for the designing an effective vaccine encompassing both the T-cell and B-cell epitopes                                                  | Computational                    |
| 125 | SARS-CoV-2 is sensitive to type I interferon pretreatment                                                                                                                                | In vitro                         |
| 126 | SARS-CoV-2 and SARS-CoV Spike-RBD Structure and Receptor Binding Comparison and Potential Implications on Neutralizing Antibody and Vaccine Development                                  | In vitro                         |
| 127 | Broad-spectrum antiviral activity of naproxen: from Influenza A to SARS-CoV-2 Coronavirus                                                                                                | In vitro                         |
| 128 | Association of Blood Glucose Control and Outcomes in Patients with COVID-19 and Pre-existing Type 2 Diabetes.                                                                            | Human-retrospective              |
| 129 | Analysis of the susceptibility of lung cancer patients to SARS-CoV-2 infection.                                                                                                          | Human                            |
| 130 | Surge capacity of intensive care units in case of acute increase in demand caused by COVID-19 in Australia.                                                                              | Human-survey                     |
| 131 | Association of Inpatient Use of Angiotensin Converting Enzyme Inhibitors and Angiotensin II Receptor Blockers with Mortality Among Patients With Hypertension Hospitalized With COVID-19 | Human-retrospective              |
| 132 | [The epidemiological characteristics of an outbreak of 2019 novel coronavirus diseases (COVID-19) in China].                                                                             | Human cohort<br>Chinese language |
| 133 | Expression of SARS-CoV-2 Entry Molecules ACE2 and TMPRSS2 in the Gut of Patients With IBD                                                                                                | Human                            |
| 134 | Attenuated SARS-CoV-2 variants with deletions at the S1/S2 junction                                                                                                                      | In vitro                         |
| 135 | SARS-CoV-2: Structural Diversity, Phylogeny, and Potential Animal Host Identification of Spike Glycoprotein                                                                              | Computational                    |
| 136 | EZH2-mediated H3K27me3 inhibits ACE2 expression                                                                                                                                          | In vitro                         |
| 137 | TMPRSS2 and TMPRSS4 promote SARS-CoV-2 infection of human small intestinal enterocytes                                                                                                   | Human                            |
| 138 | SARS-CoV-2 Receptor ACE2 Is an Interferon-Stimulated Gene in Human Airway Epithelial Cells and Is Detected in Specific Cell Subsets across Tissues                                       | Human                            |
| 139 | SARS-CoV2 (COVID-19) Structural/Evolution Dynamicome: Insights into functional evolution and human genomics.                                                                             | Computational                    |
| 140 | On spatial molecular arrangements of SARS-CoV2 genomes of Indian patients                                                                                                                | Computational                    |
| 141 | Prediction analysis of SARS-COV-2 entry in Livestock and Wild animals                                                                                                                    | In silico                        |
| 142 | Functional and Genetic Analysis of Viral Receptor ACE2 Orthologs Reveals a Broad Potential Host Range of SARS-CoV-2                                                                      | In vitro                         |
| 143 | ACE2-Variants Indicate Potential SARS-CoV-2-Susceptibility in Animals: An Extensive Molecular Dynamics Study                                                                             | In vitro                         |
| 144 | Global view on virus infection in non-human primates and implication for public health and wildlife conservation                                                                         | Computational                    |
| 145 | SARS-CoV-2 spike protein predicted to form stable complexes with host receptor protein orthologues from mammals                                                                          | Computational                    |

|     |                                                                                                                                                                                                                              |               |
|-----|------------------------------------------------------------------------------------------------------------------------------------------------------------------------------------------------------------------------------|---------------|
| 146 | An artificial intelligence system reveals liquiritin inhibits SARS-CoV-2 by mimicking type I interferon                                                                                                                      | Computational |
| 147 | Comparison of SARS-CoV-2 spike protein binding to human, pet, farm animals, and putative intermediate hosts ACE2 and ACE2 receptors                                                                                          | In vitro      |
| 148 | IgA MAb blocks SARS-CoV-2 Spike-ACE2 interaction providing mucosal immunity                                                                                                                                                  | In vitro      |
| 149 | Selectomic and Evolvability Analyses of the Highly Pathogenic Betacoronaviruses SARS-CoV-2, SARS-CoV, and MERS-CoV                                                                                                           | Computational |
| 150 | SARS-CoV-2 ORF3b is a potent interferon antagonist whose activity is further increased by a naturally occurring elongation variant                                                                                           | In vitro      |
| 151 | Multiple expression assessments of ACE2 and TMPRSS2 SARS-CoV-2 entry molecules in the urinary tract and their associations with clinical manifestations of COVID-19                                                          | Computational |
| 152 | Boceprevir, GC-376, and calpain inhibitors II, XII inhibit SARS-CoV-2 viral replication by targeting the viral main protease                                                                                                 | In vitro      |
| 153 | Rapid isolation and profiling of a diverse panel of human monoclonal antibodies targeting the SARS-CoV-2 spike protein                                                                                                       | In vitro      |
| 154 | The SARS-CoV-2 conserved macrodomain is a highly efficient ADP-ribosylhydrolase enzyme                                                                                                                                       | In vitro      |
| 155 | Identification of Drugs Blocking SARS-CoV-2 Infection using Human Pluripotent Stem Cell-derived Colonic Organoids                                                                                                            | In vitro      |
| 156 | Pathogen Reduction of SARS-CoV-2 Virus in Plasma and Whole Blood using Riboflavin and UV Light                                                                                                                               | In vitro      |
| 157 | Shotgun Transcriptome and Isothermal Profiling of SARS-CoV-2 Infection Reveals Unique Host Responses, Viral Diversification, and Drug Interactions                                                                           | In vitro      |
| 158 | Feline coronavirus drug inhibits the main protease of SARS-CoV-2 and blocks virus replication                                                                                                                                | In vitro      |
| 159 | Epigenetic regulator miRNA pattern differences among SARS-CoV, SARS-CoV-2 and SARS-CoV-2 world-wide isolates delineated the mystery behind the epic pathogenicity and distinct clinical characteristics of pandemic COVID-19 | In silico     |
| 160 | Tracing two causative SNPs reveals SARS-CoV-2 transmission in North America population                                                                                                                                       | Computational |
| 161 | Lung biopsy cells transcriptional landscape from COVID-19 patient stratified lung injury in SARS-CoV-2 infection through impaired pulmonary surfactant metabolism                                                            | Human         |
| 162 | Comparative analysis of antiviral efficacy of FDA-approved drugs against SARS-CoV-2 in human lung cells: Nafamostat is the most potent antiviral drug candidate                                                              | In vitro      |
| 163 | Traffic-derived particulate matter and angiotensin-converting enzyme 2 expression in human airway epithelial cells                                                                                                           | In vitro      |
| 164 | Bulk and single-cell gene expression profiling of SARS-CoV-2 infected human cell lines identifies molecular targets for therapeutic intervention                                                                             | In vitro      |



|     |                                                                                                                                                                                                                   |                           |
|-----|-------------------------------------------------------------------------------------------------------------------------------------------------------------------------------------------------------------------|---------------------------|
| 165 | Potential antiviral options against SARS-CoV-2 infection                                                                                                                                                          | Human                     |
| 166 | Insights into molecular evolution recombination of pandemic SARS-CoV-2 using Saudi Arabian sequences                                                                                                              | In vitro                  |
| 167 | Androgen Regulates SARS-CoV-2 Receptor Levels and Is Associated with Severe COVID-19 Symptoms in Men                                                                                                              | In vitro                  |
| 168 | In Vitro Inhibition of SARS-CoV-2 Infection by Bovine Lactoferrin                                                                                                                                                 | In vitro                  |
| 169 | Neutralization of SARS-CoV-2 by destruction of the prefusion Spike                                                                                                                                                | In vitro                  |
| 170 | Evaluation Of SYBR Green Real Time PCR For Detecting SARS-CoV-2 From Clinical Samples                                                                                                                             | Human                     |
| 171 | Transcriptional profiling reveals TRPM5-expressing cells involved in viral infection in the olfactory epithelium                                                                                                  | In vitro                  |
| 172 | Low doses of radiation therapy increase the immunosuppressive profile of lung macrophages via IL-10 production and IFN $\gamma$ /IL-6 suppression: a therapeutic strategy to counteract lung inflammation?        | In vitro                  |
| 173 | Novel NGS Pipeline for Virus Discovery from a Wide Spectrum of Hosts and Sample Types                                                                                                                             | Human                     |
| 174 | Evolutionary arms race between virus and host drives genetic diversity in bat SARS related coronavirus spike genes                                                                                                | In vitro                  |
| 175 | The Host Cell ViroCheckpoint: Identification and Pharmacologic Targeting of Novel Mechanistic Determinants of Coronavirus-Mediated Hijacked Cell States                                                           | In vitro                  |
| 176 | [Exploring the mechanism of liver enzyme abnormalities in patients with novel coronavirus-infected pneumonia]                                                                                                     | Human<br>Chinese language |
| 177 | Development and validation of a UHPLC-MS/MS method for quantification of the prodrug remdesivir and its metabolite GS-441524: a tool for clinical pharmacokinetics of SARS-CoV-2/COVID-19 and Ebola virus disease | In vitro                  |
| 178 | Immunoinformatic identification of B cell and T cell epitopes in the SARS-CoV-2 proteome                                                                                                                          | Computational             |
| 179 | Biophysical characterization of the SARS-CoV-2 spike protein binding with the ACE2 receptor and implications for infectivity                                                                                      | Computational             |
| 180 | The Red Queen's Crown: an evolutionary arms race between coronaviruses and mammalian species reflected in positive selection of the ACE2 receptor among many species                                              | Computational             |
| 181 | Infection Groups Differential (IGD) Score Reveals Infection Ability Difference between SARS-CoV-2 and Other Coronaviruses                                                                                         | Computational             |
| 182 | Origin of Novel Coronavirus (COVID-19): A Computational Biology Study using Artificial Intelligence                                                                                                               | Computational             |
| 183 | Spike mutation pipeline reveals the emergence of a more transmissible form of SARS-CoV-2                                                                                                                          | in vitro                  |
| 184 | Intra-genome variability in the dinucleotide composition of SARS-CoV-2                                                                                                                                            | Computational             |
| 185 | Identification of five antiviral compounds from the Pandemic Response Box targeting SARS-CoV-2                                                                                                                    | Computational             |

|     |                                                                                                                                                                                   |               |
|-----|-----------------------------------------------------------------------------------------------------------------------------------------------------------------------------------|---------------|
| 186 | SARS-CoV-2 is well adapted for humans. What does this mean for re-emergence?                                                                                                      | Computational |
| 187 | Architecture and self-assembly of the SARS-CoV-2 nucleocapsid protein                                                                                                             | In vitro      |
| 188 | Distinct conformational states of SARS-CoV-2 spike protein                                                                                                                        | In vitro      |
| 189 | SARS-CoV-2 amino acid substitutions widely spread in the human population are mainly located in highly conserved segments of the structural proteins                              | Computational |
| 190 | Broad sarbecovirus neutralizing antibodies define a key site of vulnerability on the SARS-CoV-2 spike protein                                                                     | In vitro      |
| 191 | Predicting the Immunogenicity of T cell epitopes: From HIV to SARS-CoV-2                                                                                                          | Computational |
| 192 | An integrated in silico immuno-genetic analytical platform provides insights into COVID-19 serological and vaccine targets                                                        | Computational |
| 193 | COVID-19: Viral-host interactome analyzed by network based-approach model to study pathogenesis of SARS-CoV-2 infection                                                           | Computational |
| 194 | CoV-AbDab: the Coronavirus Antibody Database                                                                                                                                      | Computational |
| 195 | In Silico Trial to test COVID-19 candidate vaccines: a case study with UISS platform                                                                                              | In Silico     |
| 196 | Children's Hospital Los Angeles COVID-19 Analysis Research Database (CARD) – A Resource for Rapid SARS-CoV-2 Genome Identification Using Interactive Online Phylogenetic Tools    | Computational |
| 197 | Identification of conserved epitopes in SARS-CoV-2 spike and nucleocapsid protein                                                                                                 | Computational |
| 198 | SARS-CoV-2 Spike Glycoprotein Receptor Binding Domain is Subject to Negative Selection with Predicted Positive Selection Mutations                                                | Computational |
| 199 | ACE2 interaction networks in COVID-19: a physiological framework for prediction of outcome in patients with cardiovascular risk factors                                           | Computational |
| 200 | The UCSC SARS-CoV-2 Genome Browser                                                                                                                                                | Computational |
| 201 | A Combined approach of MALDI-TOF Mass Spectrometry and multivariate analysis as a potential tool for the detection of SARS-CoV-2 virus in nasopharyngeal swabs                    | In vitro      |
| 202 | Structural basis for translational shutdown and immune evasion by the Nsp1 protein of SARS-CoV-2                                                                                  | In vitro      |
| 203 | A comprehensive germline variant and expression analyses of ACE2, TMPRSS2 and SARS-CoV-2 activator FURIN genes from the Middle East: Combating SARS-CoV-2 with precision medicine | Computational |
| 204 | Deep phylogenetic analysis of Orthocoronavirinae genomes traces the origin, evolution and transmission route of 2019 novel coronavirus                                            | Computational |
| 205 | Epitope-Based Peptide Vaccine Against Severe Acute Respiratory Syndrome-Coronavirus-2 Nucleocapsid Protein: An in silico Approach                                                 | In silico     |
| 206 | In silico design and validation of commercial kit GPS™ CoVID-19                                                                                                                   | In silico     |

|     |                                                                                                                                                                                                 |               |
|-----|-------------------------------------------------------------------------------------------------------------------------------------------------------------------------------------------------|---------------|
|     | dtec-RT-qPCR Test under criteria of UNE/EN ISO 17025:2005 and ISO/IEC 15189:2012                                                                                                                |               |
| 207 | Comparative Genomic Analysis of Rapidly Evolving SARS-CoV-2 Viruses Reveal Mosaic Pattern of Phylogeographical Distribution                                                                     | Computational |
| 208 | The SARS-CoV-2-like virus found in captive pangolins from Guangdong should be better sequenced                                                                                                  | Computational |
| 209 | SARS-CoV-2 transcriptome analysis and molecular cataloguing of immunodominant epitopes for multi-epitope based vaccine design                                                                   | In silico     |
| 210 | A putative new SARS-CoV protein, 3a*, encoded in an ORF overlapping ORF3a                                                                                                                       | Computational |
| 211 | Crystal structures of SARS-CoV-2 ADP-ribose phosphatase (ADRP): from the apo form to ligand complexes                                                                                           | In vitro      |
| 212 | Whole Genome Comparison of Pakistani Corona Virus with Chinese and US Strains along with its Predictive Severity of COVID-19                                                                    | Computational |
| 213 | Knowledge, attitude and practice of secondary school students toward COVID-19 epidemic in Italy: a cross sectional study                                                                        | Human-survey  |
| 214 | Analysis of the SARS-CoV-2 spike protein glycan shield: implications for immune recognition                                                                                                     | In vitro      |
| 215 | Evolutionary Dynamics And Geographic Dispersal Of Beta Coronaviruses In African Bats                                                                                                            | Computational |
| 216 | Potent programmable antiviral against dengue virus in primary human cells by Cas13b RNP with short spacer and delivery by virus-like particle                                                   | in silico     |
| 217 | ACE2 polymorphisms and individual susceptibility to SARS-CoV-2 infection: insights from an in-silico study                                                                                      | in-silico     |
| 218 | COVID-19 coronavirus vaccine design using reverse vaccinology and machine learning                                                                                                              | Computational |
| 219 | A Large-scale Drug Repositioning Survey for SARS-CoV-2 Antivirals                                                                                                                               | In vitro      |
| 220 | Regulation of angiotensin converting enzyme 2 (ACE2) in obesity: implications for COVID-19                                                                                                      | Computational |
| 221 | Knowledge synthesis from 100 million biomedical documents augments the deep expression profiling of coronavirus receptors                                                                       | Computational |
| 222 | Controlling the SARS-CoV-2 outbreak, insights from large scale whole genome sequences generated across the world                                                                                | Computational |
| 223 | SARS-CoV-2 receptor and entry genes are expressed by sustentacular cells in the human olfactory neuroepithelium                                                                                 | Human         |
| 224 | Significant expression of FURIN and ACE2 on oral epithelial cells may facilitate the efficiency of SARS-CoV-2 entry                                                                             | Computational |
| 225 | When Darkness Becomes a Ray of Light in the Dark Times: Understanding the COVID-19 via the Comparative Analysis of the Dark Proteomes of SARS-CoV-2, Human SARS and Bat SARS-Like Coronaviruses | Computational |
| 226 | Re-analysis of SARS-CoV-2 infected host cell proteomics time-                                                                                                                                   | Computational |

|     |                                                                                                                                                                                                                  |               |
|-----|------------------------------------------------------------------------------------------------------------------------------------------------------------------------------------------------------------------|---------------|
|     | course data by impact pathway analysis and network analysis. A potential link with inflammatory response                                                                                                         |               |
| 227 | Comparison of commercial RT-PCR diagnostic kits for COVID-19                                                                                                                                                     | In vitro      |
| 228 | The genomic variation landscape of globally-circulating clades of SARS-CoV-2 defines a genetic barcoding scheme                                                                                                  | Computational |
| 229 | Comparative analyses of SAR-CoV2 genomes from different geographical locations and other coronavirus family genomes reveals unique features potentially consequential to host-virus interaction and pathogenesis | Computational |
| 230 | The global population of SARS-CoV-2 is composed of six major subtypes                                                                                                                                            | Computational |
| 231 | SARS-CoV-2, an evolutionary perspective of interaction with human ACE2 reveals undiscovered amino acids necessary for complex stability                                                                          | Computational |
| 232 | SARS-CoV-2 exhibits intra-host genomic plasticity and low-frequency polymorphic quasispecies                                                                                                                     | Computational |
| 233 | Master Regulator Analysis of the SARS-CoV-2/Human interactome                                                                                                                                                    | Computational |
| 234 | SARS-CoV-2 and ORF3a: Non-Synonymous Mutations and Polyproline Regions                                                                                                                                           | Computational |
| 235 | SARS-CoV-2 might manipulate against its host the immunity RNAi/Dicer/Ago system                                                                                                                                  | Computational |
| 236 | Pangolin homology associated with 2019-nCoV                                                                                                                                                                      | Computational |
| 237 | IDseq – An Open Source Cloud-based Pipeline and Analysis Service for Metagenomic Pathogen Detection and Monitoring                                                                                               | Computational |
| 238 | The accelerated infectious disease risk in the Anthropocene: more outbreaks and wider global spread                                                                                                              | Computational |
| 239 | Orthogonal genome-wide screenings in bat cells identify MTHFD1 as a target of broad antiviral therapy                                                                                                            | Computational |
| 240 | Cross-scale dynamics and the evolutionary emergence of infectious diseases                                                                                                                                       | Computational |
| 241 | Broad Host Range of SARS-CoV-2 Predicted by Comparative and Structural Analysis of ACE2 in Vertebrates                                                                                                           | Computational |
| 242 | Modeling the epidemic dynamics and control of COVID-19 outbreak in China.                                                                                                                                        | Computational |
| 243 | Genome Composition and Divergence of the Novel Coronavirus (2019-nCoV) Originating in China                                                                                                                      | Computational |
| 244 | Computers and viral diseases. Preliminary bioinformatics studies on the design of a synthetic vaccine and a preventative peptidomimetic antagonist against the SARS-CoV-2 (2019-nCoV, COVID-19) coronavirus      | Computational |
| 245 | Receptor Recognition by the Novel Coronavirus from Wuhan: an Analysis Based on Decade-Long Structural Studies of SARS Coronavirus.                                                                               | Computational |
| 246 | Establishment and validation of a pseudovirus neutralization assay for SARS-CoV-2                                                                                                                                | In vitro      |
| 247 | Crystal structure of SARS-CoV-2 main protease provides a basis                                                                                                                                                   | In vitro      |

|     |                                                                                                                                                                                                   |               |
|-----|---------------------------------------------------------------------------------------------------------------------------------------------------------------------------------------------------|---------------|
|     | for design of improved $\hat{\mu}$ -ketoamide inhibitors                                                                                                                                          |               |
| 248 | Inhibition of SARS-CoV-2 (Previously 2019-nCoV) Infection by a Highly Potent Pan-Coronavirus Fusion Inhibitor Targeting Its Spike Protein That Harbors a High Capacity to Mediate Membrane Fusion | In vitro      |
| 249 | Spike protein recognition of mammalian ACE2 predicts the host range and an optimized ACE2 for SARS-CoV-2 infection                                                                                | Computational |
| 250 | Aerosol and Surface Distribution of Severe Acute Respiratory Syndrome Coronavirus 2 in Hospital Wards, Wuhan, China, 2020                                                                         | In vitro      |
| 251 | Supporting pandemic response using genomics and bioinformatics: a case study on the emergent SARS-CoV-2 outbreak                                                                                  | In vitro      |
| 252 | The SARS-CoV-2 receptor ACE2 expression of maternal-fetal interface and fetal organs by single-cell transcriptome study                                                                           | Computational |
| 253 | Clinical features of the first cases and a cluster of Coronavirus Disease 2019 (COVID-19) in Bolivia imported from Italy and Spain                                                                | Human         |
| 254 | Bioinformatic analysis indicates that SARS-CoV-2 is unrelated to known artificial coronaviruses                                                                                                   | Computational |
| 255 | Rapid community-driven development of a SARS-CoV-2 tissue simulator                                                                                                                               | Computational |
| 256 | Identification and enrichment of SECRETE cis-acting RNA elements in the Coronaviridae and other (+) single-strand RNA viruses                                                                     | Computational |
| 257 | LY6E Restricts the Entry of Human Coronaviruses, including the currently pandemic SARS-CoV-2                                                                                                      | In vitro      |
| 258 | eCovSens-Ultrasensitive Novel In-House Built Printed Circuit Board Based Electrochemical Device for Rapid Detection of nCovid-19 antigen, a spike protein domain 1 of SARS-CoV-2                  | In vitro      |
| 259 | Coronavirus, as a source of pandemic pathogens.                                                                                                                                                   | Computational |
| 260 | A new phylogenetic protocol: Dealing with model misspecification and confirmation bias in molecular phylogenetics                                                                                 | Computational |
| 261 | Parallel global profiling of plant TOR dynamics reveals a conserved role for LARP1 in protein translation                                                                                         | In vitro      |
| 262 | MicrobioLink: An integrated computational pipeline to infer functional effects of microbiome-host interactions                                                                                    | Computational |
| 263 | Omics BioAnalytics: Reproducible Research using R Shiny and Alexa                                                                                                                                 | Computational |
| 264 | Microneedle array delivered recombinant coronavirus vaccines: Immunogenicity and rapid translational developmen                                                                                   | In vitro      |
| 265 | Ecological processes underlying the emergence of novel enzootic cycles—arboviruses in the neotropics as a case study                                                                              | Computational |
| 266 | High Throughput Designing and Mutational Mapping of RBD-ACE2 Interface Guide Non-Conventional Therapeutic Strategies for COVID-19                                                                 | Computational |

|    | <b>CATEGORY B</b>                                                                                                                                                | <b>Animal models without SARS-CoV-2 inoculation</b> |
|----|------------------------------------------------------------------------------------------------------------------------------------------------------------------|-----------------------------------------------------|
| 1  | A novel antiviral formulation inhibits a range of enveloped viruses                                                                                              | Other viruses                                       |
| 2  | Structure-based design of hepatitis C virus E2 glycoprotein improves serum binding and cross-neutralization                                                      | No inoculation                                      |
| 3  | Self-amplifying RNA SARS-CoV-2 lipid nanoparticle vaccine induces equivalent preclinical antibody titers and viral neutralization to recovered COVID-19 patients | S PROTEIN/VACCINE                                   |
| 4  | Treating Influenza and SARS-CoV-2 via mRNA-encoded Cas13a                                                                                                        | Influenza A virus                                   |
| 5  | Structural Basis for Potent Neutralization of Betacoronaviruses by Single-domain Camelid Antibodies                                                              | NO INOCULATION                                      |
| 6  | Tissue-resident CD8+ T cells drive age-associated chronic lung sequelae following viral pneumonia                                                                | Primary influenza virus                             |
| 7  | Predicting the presence and titer of rabies virus neutralizing antibodies from low-volume serum samples in low-containment facilities                            | Murine leukemia virus<br>Not SARS-CoV-              |
| 8  | Social Stress Alters Immune Response and Results in Higher Viral Load During Acute SIV Infection in a Pigtailed Macaque Model of HIV                             | HIV NOT SARS-CoV-2                                  |
| 9  | Mucin 4 Protects Female Mice from Coronavirus Pathogenesis                                                                                                       | Sars-Cov-1 NOT SARS-CoV-2                           |
| 10 | Nonmedical Masks in Public for Respiratory Pandemics: Droplet Retention by Two-Layer Textile Barrier Fully Protects Germ-free Mice from Bacteria in Droplets     | NO INOCULATION                                      |
| 11 | Safety, pharmacokinetics, and liver-stage Plasmodium cynomolgi effect of high-dose ivermectin and chloroquine in Rhesus Macaques                                 | NO INOCULATION                                      |
| 12 | Seasonal weight changes in laboratory ferrets                                                                                                                    | NO INOCULATION                                      |
| 13 | An orally bioavailable broad-spectrum antiviral inhibits SARS-CoV-2 and multiple endemic, epidemic and bat coronavirus                                           | MERS-CoV                                            |
| 14 | Immunity-and-Matrix-Regulatory Cells Derived from Human Embryonic Stem Cells Safely and Effectively Treat Mouse Lung Injury and Fibrosis                         | NO INOCULATION                                      |
| 15 | Cross-reactive neutralization of SARS-CoV-2 by serum antibodies from recovered SARS patients and immunized animals                                               | NO INOCULATION                                      |
| 16 | Remdesivir inhibits renal fibrosis in obstructed kidneys                                                                                                         | NO INOCULATION                                      |
| 17 | No evidence that androgen regulation of pulmonary TMPRSS2 explains sex-discordant COVID-19 outcomes                                                              | NO INOCULATION                                      |
| 18 | Artesunate interacts with Vitamin D receptor to reverse mouse model of sepsis-induced immunosuppression via enhancing autophagy                                  | Pseudomonas<br>Aeruginosa                           |
| 19 | Fractal analysis of muscle activity patterns during locomotion: pitfalls and how to avoid them                                                                   | No inoculation                                      |

|    |                                                                                                                                                                                                           |                       |
|----|-----------------------------------------------------------------------------------------------------------------------------------------------------------------------------------------------------------|-----------------------|
| 20 | An orally bioavailable broad-spectrum antiviral inhibits SARS-CoV-2 in human airway epithelial cell cultures and multiple coronaviruses in mice                                                           | MERS-CoV              |
| 21 | Single-Dose, Intranasal Immunization with Recombinant Parainfluenza Virus 5 Expressing Middle East Respiratory Syndrome Coronavirus (MERS-CoV) Spike Protein Protects Mice from Fatal MERS-CoV Infection. | MERS-CoV              |
| 22 | Key residues of the receptor binding motif in the spike protein of SARS-CoV-2 that interact with ACE2 and neutralizing antibodies                                                                         | No inoculation        |
| 23 | Acute chloroquine poisoning: A comprehensive experimental toxicology assessment of the role of diazepam                                                                                                   | Drug testing          |
| 24 | An effective CTL peptide vaccine for Ebola Zaire Based on Survivors' CD8+ targeting of a particular nucleocapsid protein epitope with potential implications for COVID-19 vaccine design                  | Ebola                 |
| 25 | Analysis and annotation of genome-wide DNA methylation patterns in two nonhuman primate species using the Infinium Human Methylation 450K and EPIC BeadChips                                              | No inoculation        |
| 26 | Mesenchymal stem cells with overexpression of Angiotensin-converting enzyme-2 improved the microenvironment and cardiac function in a rat model of myocardial infarction                                  | No inoculation        |
| 27 | Background mechanisms of olfactory dysfunction in COVID-19: expression of ACE2, TMPRSS2, and Furin in the nose and olfactory bulb in human and mice                                                       | No inoculation        |
| 28 | Yeast-Expressed SARS-CoV Recombinant Receptor-Binding Domain (RBD219-N1) Formulated with Alum Induces Protective Immunity and Reduces Immune Enhancement                                                  | SARS-CoV-1            |
| 29 | Development of a COVID-19 vaccine based on the receptor binding domain displayed on virus-like particles                                                                                                  | No inoculation        |
| 30 | The WD and linker domains of ATG16L1 required for non-canonical autophagy limit lethal respiratory infection by influenza A virus at epithelial surfaces                                                  | Influenza A virus     |
| 31 | SARS-CoV2 infection in farmed mink, Netherlands, April 2020                                                                                                                                               | Cohort (not model)    |
| 32 | Skin Delivery of Modified Vaccinia Ankara Viral Vectors Generates Superior T Cell Immunity Against a Respiratory Viral Challenge                                                                          | Not SARS-CoV-2        |
| 33 | Antibody repertoire induced by SARS-CoV-2 spike protein immunogens                                                                                                                                        | No challenge          |
| 34 | Expression of ACE2 and TMPRSS2 proteins in the upper and lower aerodigestive tracts of rats                                                                                                               | No inoculation        |
| 35 | Type III interferons disrupt the lung epithelial barrier upon viral recognition                                                                                                                           | Staphylococcus aureus |
| 36 | Type I and III interferons disrupt lung epithelial repair during recovery from viral infection                                                                                                            | Influenza virus       |
| 37 | Broad-spectrum antivirals of protoporphyrins inhibit the entry of highly pathogenic emerging viruses                                                                                                      | Influenza virus       |
| 38 | Global genetic patterns reveal host tropism versus cross-taxon                                                                                                                                            | No inoculation        |

|    |                                                                                                                                                                                           |                                   |
|----|-------------------------------------------------------------------------------------------------------------------------------------------------------------------------------------------|-----------------------------------|
|    | transmission of bat Betacoronaviruses                                                                                                                                                     |                                   |
| 39 | Individualized System for Augmenting Ventilator Efficacy (iSAVE): A Rapidly deployable system to expand ventilator capacity                                                               | No inoculation                    |
| 40 | Recombinant SARS-CoV-2 spike S1-Fc fusion protein induced high levels of neutralizing responses in nonhuman primates                                                                      | No inoculation<br>Read in full    |
| 41 | Single-cell atlas of a non-human primate reveals new pathogenic mechanisms of COVID-19                                                                                                    | No inoculation                    |
| 42 | Structure, function and antigenicity of the SARS-CoV-2 spike glycoprotein                                                                                                                 | No inoculation                    |
| 43 | Susceptibility of tree shrew to SARS-CoV-2 infection                                                                                                                                      | No disease model?                 |
| 44 | Therapeutic efficacy of Pudilan Xiaoyan Oral Liquid (PDL) for COVID-19 in vitro and in vivo                                                                                               | No methods                        |
| 45 | Prophylactic and therapeutic remdesivir (GS-5734) treatment in the rhesus macaque model of MERS-CoV infection                                                                             | MERS-CoV                          |
| 46 | Chemical composition and pharmacological mechanism of Qingfei Paidu Decoction and Ma Xing Shi Gan Decoction against Coronavirus Disease 2019 (COVID-19): in silico and experimental study | LPS-PNEUMONIA                     |
| 47 | Immune modulation to improve survival of respiratory virus infections in mice                                                                                                             | PNEUMONIA MODEL<br>NOT SARS CoV-2 |
| 48 | Non-neuronal expression of SARS-CoV-2 entry genes in the olfactory system suggests mechanisms underlying COVID-19-associated anosmia                                                      | No inoculation                    |
| 49 | Immunoglobulin fragment F(ab') <sub>2</sub> against RBD potently neutralizes SARS-CoV-2 in vitro                                                                                          | No inoculation                    |
| 50 | Glycomic analysis of host-response reveals high mannose as a key mediator of influenza severity                                                                                           | H1N1                              |
| 51 | Coronavirus surveillance of wildlife in the Lao People's Democratic Republic detects viral RNA in rodents                                                                                 | No inoculation                    |
| 52 | Mapping the Immunodominance Landscape of SARS-CoV-2 Spike Protein for the Design of Vaccines against COVID-19                                                                             | No inoculation                    |
| 53 | Classical drug digitoxin inhibits influenza cytokine storm, with implications for COVID-19 therapy.                                                                                       | No inoculation                    |
| 54 | JAK1 inhibition blocks lethal sterile immune responses: implications for COVID-19 therapy                                                                                                 | Viral mimetics                    |
| 55 | LY6E impairs coronavirus fusion and confers immune control of viral disease                                                                                                               | MHV-A59 virus                     |
| 56 | Corona virus activates a stem cell mediated defense mechanism that accelerates activation of dormant tuberculosis: implications for the COVID-19 pandemic                                 | MHV-1 virus                       |
| 57 | The SARS-CoV-2 receptor-binding domain elicits a potent neutralizing response without antibody-dependent enhancement                                                                      | No inoculation                    |
| 58 | SARS-CoV-2 neutralizing serum antibodies in cats: a serological investigation                                                                                                             | No inoculation                    |



|          |                                                                                                                                                                                                         |                                       |
|----------|---------------------------------------------------------------------------------------------------------------------------------------------------------------------------------------------------------|---------------------------------------|
| 59       | Absence of SARS-CoV-2 infection in cats and dogs in close contact with a cluster of COVID-19 patients in a veterinary campus                                                                            | No inoculation                        |
| 60       | A single dose SARS-CoV-2 simulating particle vaccine induces potent neutralizing activities                                                                                                             | Different viruses                     |
| 61       | Pericyte-specific vascular expression of SARS-CoV-2 receptor ACE2 – implications for microvascular inflammation and hypercoagulopathy in COVID-19 patients                                              | No inoculation                        |
| 62       | Novel and potent inhibitors targeting DHODH, a rate-limiting enzyme in de novo pyrimidine biosynthesis, are broad-spectrum antiviral against RNA viruses including newly emerged coronavirus SARS-CoV-2 | H1N1                                  |
| 63       | Leveraging mRNAs sequences to express SARS-CoV-2 antigens in vivo                                                                                                                                       | No inoculation                        |
| 64       | Indomethacin has a potent antiviral activity against SARS CoV-2 in vitro and canine coronavirus in vivo                                                                                                 | Canine corona virus<br>Not SARS-CoV-2 |
| 65       | Python nidoviruses, more than respiratory pathogens                                                                                                                                                     | Nidoviruses<br>Not SARS-CoV-2         |
| 66       | Tissue-specific delivery system via AFF-1-coated pseudotyped Vesicular Stomatitis Virus in <i>C. elegans</i>                                                                                            | Not SARS-CoV-2                        |
| 67       | Non-invasive surveys of mammalian viruses using environmental DNA                                                                                                                                       | No inoculation                        |
| 68       | Cellular senescence limits acute lung injury induced by mechanical ventilation                                                                                                                          | No inoculation                        |
| 69       | Are pangolins the intermediate host of the 2019 novel coronavirus (2019-nCoV) ?                                                                                                                         | No inoculation                        |
| 70       | Isolation and Characterization of 2019-nCoV-like Coronavirus from Malayan Pangolin                                                                                                                      | No inoculation                        |
| 71       | A novel bat coronavirus reveals natural insertions at the S1/S2 cleavage site of the Spike protein and a possible recombinant origin of HCoV-19                                                         | No inoculation                        |
| 72       | Mechanistic understanding enables the rational design of salicylanilide combination therapies for Gram-negative infections                                                                              | Other organisms                       |
|          | <b>CATEGORY C</b>                                                                                                                                                                                       | <b>Not original research</b>          |
| <b>1</b> | The origin and underlying driving forces of the SARS-CoV-2 outbreak                                                                                                                                     | Review                                |
| 2        | Severe acute respiratory syndrome-related coronavirus: The species and its viruses – a statement of the Coronavirus Study Group                                                                         | Letter                                |
| 3        | Novel human coronavirus (SARS-CoV-2): A lesson from animal coronaviruses.                                                                                                                               | Review                                |
| 4        | COVID-19: Epidemiology, Evolution, and Cross-Disciplinary Perspectives                                                                                                                                  | Review                                |
| 5        | Serum albumin-mediated strategy for the effective targeting of                                                                                                                                          | Review                                |

|    |                                                                                                                                                                     |                  |
|----|---------------------------------------------------------------------------------------------------------------------------------------------------------------------|------------------|
|    | SARS-CoV-2.                                                                                                                                                         |                  |
| 6  | Focus on Receptors for Coronaviruses with Special Reference to Angiotensin-converting Enzyme 2 as a Potential Drug Target - A Perspective.                          | Letter           |
| 7  | Of mice and men: COVID-19 challenges translational neuroscience.                                                                                                    | Letter           |
| 8  | Does SARS-Cov-2 invade the brain? Translational lessons from animal models.                                                                                         | Review           |
| 9  | Vaccines for SARS-CoV-2: Lessons from Other Coronavirus Strains.                                                                                                    | Review           |
| 10 | Is GSK3 $\beta$ a molecular target of chloroquine treatment against COVID-19?                                                                                       | Review           |
| 11 | The anti-viral facet of anti-rheumatic drugs: Lessons from COVID-19.                                                                                                | Review           |
| 12 | Cardiac Manifestations Of Coronavirus (COVID-19).                                                                                                                   | Review           |
| 13 | [ACE-inhibitors, angiotensin receptor blockers and severe acute respiratory syndrome caused by coronavirus].                                                        | Review (Italian) |
| 14 | Should we expect neurological symptoms in the SARS-CoV-2 epidemic?                                                                                                  | Review           |
| 15 | Defining Protective Epitopes for COVID-19 Vaccination Models.                                                                                                       | Letter           |
| 16 | SARS-CoV-2 Vaccines: Status Report.                                                                                                                                 | Report           |
| 17 | ACE2 the Janus-faced protein - from cardiovascular protection to severe acute respiratory syndrome-coronavirus and COVID-19.                                        | Letter           |
| 18 | A consensus statement on the use of angiotensin receptor blockers and angiotensin converting enzyme inhibitors in relation to COVID-19 (corona virus disease 2019). | Letter           |
| 19 | Perioperative Presentation of COVID-19 Disease in a Liver Transplant Recipient.                                                                                     | Case report      |
| 20 | COVID-19 Challenges Basic Researchers                                                                                                                               | Letter           |
| 21 | Don't rush to deploy COVID-19 vaccines and drugs without sufficient safety guarantees                                                                               | Letter           |
| 22 | Can the Coronavirus Disease 2019 (COVID-19) Affect the Eyes? A Review of Coronaviruses and Ocular Implications in Humans and Animals                                | Review           |
| 23 | Compounds with Therapeutic Potential against Novel Respiratory 2019 Coronavirus                                                                                     | Review           |
| 24 | Analysis of angiotensin-converting enzyme 2 (ACE2) from different species sheds some light on cross-species receptor usage of a novel coronavirus 2019-nCoV         | letter           |
| 25 | This scientist hopes to test coronavirus drugs on animals in locked-down Wuhan.                                                                                     | Letter           |
| 26 | COVID-19 and the Heart                                                                                                                                              | Review           |
| 27 | SARS-CoV-2: Olfaction, Brain Infection, and the Urgent Need for Clinical Samples Allowing Earlier Virus Detection                                                   | Review           |
| 28 | The possible mechanisms of action of 4-aminoquinolines (chloroquine/hydroxychloroquine) against Sars-Cov-2 infection                                                | Review           |

|    |                                                                                                                                                           |        |
|----|-----------------------------------------------------------------------------------------------------------------------------------------------------------|--------|
|    | (COVID-19): A role for iron homeostasis?                                                                                                                  |        |
| 29 | COVID-19 shot protects monkeys                                                                                                                            | Letter |
| 30 | Hypothesized behavioral host manipulation by SARS-CoV2/COVID-19 infection                                                                                 | Review |
| 31 | Animal models for emerging coronavirus: progress and new insights                                                                                         | Review |
| 32 | Kallikrein-kinin blockade in patients with COVID-19 to prevent acute respiratory distress syndrome                                                        | Review |
| 33 | Canine Respiratory Coronavirus: A Naturally Occurring Model of COVID-19?                                                                                  | Review |
| 34 | Reducing risks from coronavirus transmission in the home-the role of viral load                                                                           | Review |
| 35 | Interactions between antihyperglycemic drugs and the renin-angiotensin system: Putative roles in COVID-19. A mini-review                                  | Review |
| 36 | Development of Remdesivir Repositioning as a Nucleotide Analog Against COVID-19 RNA Dependent RNA Polymerase                                              | Review |
| 37 | The renin-angiotensin system - a therapeutic target in COVID-19?                                                                                          | Review |
| 38 | Chaos theory applied to the outbreak of COVID-19: an ancillary approach to decision making in pandemic context                                            | Review |
| 39 | Possible challenges in behavioral phenotyping of rodents following COVID-19 lockdown                                                                      | Letter |
| 40 | Hypothesis for potential pathogenesis of SARS-CoV-2 infection—a review of immune changes in patients with viral pneumonia                                 | Review |
| 41 | COVID-19, ACE2, and the cardiovascular consequences                                                                                                       | Review |
| 42 | Zoonotic origins of human coronaviruses                                                                                                                   | Review |
| 43 | Coronaviruses and SARS-COV-2                                                                                                                              | Review |
| 44 | Learning from our immunological history: What can SARS-CoV teach us about SARS-CoV-2?                                                                     | Letter |
| 45 | Interactions of coronaviruses with ACE2, angiotensin II, and RAS inhibitors-lessons from available evidence and insights into COVID-19                    | Review |
| 46 | Could Intravenous Immunoglobulin Collected from Recovered Coronavirus Patients Protect against COVID-19 and Strengthen the Immune System of New Patients? | Review |
| 47 | Covid-19, Coronavirus, SARS-CoV-2 and the small bowel                                                                                                     | Review |
| 48 | First respiratory transmitted food borne outbreak?                                                                                                        | Review |
| 49 | Is COVID-19 the first pandemic that evolves into a panzootic?                                                                                             | Review |
| 50 | The COVID-19 Pandemic: A Comprehensive Review of Taxonomy, Genetics, Epidemiology, Diagnosis, Treatment, and Control                                      | Review |
| 51 | Harnessing innate immunity to eliminate SARS-CoV-2 and ameliorate COVID-19 disease                                                                        | Letter |
| 52 | Sex-Specific SARS-CoV-2 Mortality: Among Hormone-Modulated ACE2 Expression, Risk of Venous Thromboembolism and Hypovitaminosis D                          | Review |
| 53 | Biological plausibility for interactions between dietary fat,                                                                                             | Review |

|    |                                                                                                                                                |                  |
|----|------------------------------------------------------------------------------------------------------------------------------------------------|------------------|
|    | resveratrol, ACE2, and SARS-CoV illness severity                                                                                               |                  |
| 54 | Prevention and therapy of COVID-19 via exogenous estrogen treatment for both male and female patients                                          | Review           |
| 55 | Elevated exhaustion levels and reduced functional diversity of T cells in peripheral blood may predict severe progression in COVID-19 patients | Letter           |
| 56 | Inhaled biguanides and mTOR inhibition for influenza and coronavirus (Review)                                                                  | Review           |
| 57 | A Review: Does Complement or the Contact System Have a Role in Protection or Pathogenesis of COVID-19?                                         | Review           |
| 58 | [SARS-CoV-2-a challenge for all of us]                                                                                                         | Letter<br>German |
| 59 | COVID-19 Q&A: Animal care continues                                                                                                            | Letter           |
| 60 | Zoonotic origins of human coronavirus 2019 (HCoV-19 / SARS-CoV-2): why is this work important?                                                 | Letter           |
| 61 | SARS-CoV2 induced respiratory distress: Can cannabinoids be added to anti-viral therapies to reduce lung inflammation?                         | Letter           |
| 62 | COVID-19 Q&A: Keeping a cancer core going                                                                                                      | Letter           |
